# Supplementary material for: Using Ipomoea aquatic as an environmental-friendly alternative to Elodea nuttallii for the aquaculture of Chinese mitten crab
Source: PeerJ. 2019 Apr 19;7:e6785. doi: 10.7717/peerj.6785 (PMC6476289; doi:10.7717/peerj.6785)
Supplement: Supplemental Information 7 — Raw data of nutrient contents of different macrophyte plants applied for preparation for Fig. 3. [file peerj-07-6785-s007.xlsx]

## Sheet: Sheet1
Table: assimilated nutrients by the three macrophytes (n=3)
Treat	N	P	sd.N	sd.P
IA	118	7.71242	24	4.6
EN	33.7143	10.6354	5	2.8
OS	78.6667	5.24444	12.1	3.5
EN, Elodea nuttallii; OS, Oryza sativa; IA, Ipomoea aquatica.
